# Supplementary material for: Characteristics and prognosis of pelvic Ewing sarcoma: a SEER population-based study
Source: PeerJ. 2019 Sep 17;7:e7710. doi: 10.7717/peerj.7710 (PMC6753919; doi:10.7717/peerj.7710)
Supplement: Supplemental Information 1 [file peerj-07-7710-s001.xlsx]

## Sheet: Sheet1
Age	Sex	Race	Tumor size	Stage	Surgery	Radiotherapy	Treatment	Vital status	Survival months
13 - 19 y	Female	Black & Others	>8cm	Distant	No	No	No treatment	Dead	10
13 - 19 y	Male	White	>8cm	Regional	No	No	No treatment	Dead	72
13 - 19 y	Male	White	>8cm	Distant	No	No	No treatment	Alive	132
13 - 19 y	Male	Black & Others	>8cm	Regional	No	No	No treatment	Dead	34
20 - 39 y	Female	White	>8cm	Distant	No	No	No treatment	Dead	13
13 - 19 y	Female	Black & Others	>8cm	Regional	No	No	No treatment	Alive	82
13 - 19 y	Male	Black & Others	≤8cm	Regional	No	No	No treatment	Alive	82
20 - 39 y	Female	White	≤8cm	Distant	Yes	Yes	surgery+RT	Alive	75
20 - 39 y	Male	White	≤8cm	Distant	Yes	Yes	surgery+RT	Dead	24
13 - 19 y	Male	White	>8cm	Distant	No	No	No treatment	Alive	54
20 - 39 y	Male	White	>8cm	Regional	No	No	No treatment	Dead	47
13 - 19 y	Female	Black & Others	>8cm	Distant	No	No	No treatment	Dead	9
≤12 y	Male	White	≤8cm	Regional	No	No	No treatment	Alive	7
13 - 19 y	Male	Black & Others	>8cm	Regional	No	No	No treatment	Dead	67
13 - 19 y	Female	White	≤8cm	Localized	Yes	Yes	surgery+RT	Alive	128
20 - 39 y	Female	White	≤8cm	Regional	Yes	Yes	surgery+RT	Alive	124
20 - 39 y	Male	White	≤8cm	Regional	No	No	No treatment	Alive	113
20 - 39 y	Male	White	>8cm	Regional	No	No	No treatment	Dead	28
≤12 y	Male	White	>8cm	Localized	No	No	No treatment	Alive	74
20 - 39 y	Male	White	≤8cm	Regional	Yes	Yes	surgery+RT	Dead	17
13 - 19 y	Male	White	≤8cm	Distant	No	No	No treatment	Alive	71
13 - 19 y	Male	White	>8cm	Localized	Yes	No	surgery only	Dead	43
≤12 y	Female	White	≤8cm	Regional	Yes	Yes	surgery+RT	Alive	70
13 - 19 y	Male	White	>8cm	Localized	No	No	No treatment	Alive	59
13 - 19 y	Male	White	≤8cm	Localized	Yes	Yes	surgery+RT	Alive	35
13 - 19 y	Female	White	≤8cm	Distant	No	No	No treatment	Alive	34
20 - 39 y	Male	White	>8cm	Distant	No	No	No treatment	Alive	33
20 - 39 y	Female	White	>8cm	Distant	No	No	No treatment	Alive	1
20 - 39 y	Male	White	>8cm	Localized	No	No	No treatment	Alive	137
20 - 39 y	Male	White	>8cm	Regional	No	No	No treatment	Dead	17
13 - 19 y	Male	White	>8cm	Regional	Yes	No	surgery only	Dead	37
20 - 39 y	Male	White	>8cm	Regional	Yes	Yes	surgery+RT	Dead	25
20 - 39 y	Female	White	>8cm	Distant	No	No	No treatment	Dead	11
20 - 39 y	Female	White	>8cm	Distant	No	No	No treatment	Dead	5
20 - 39 y	Male	White	>8cm	Distant	No	No	No treatment	Alive	35
20 - 39 y	Male	White	>8cm	Distant	No	No	No treatment	Alive	25
≤12 y	Male	White	≤8cm	Localized	Yes	No	surgery only	Alive	16
≤12 y	Female	White	≤8cm	Distant	Yes	No	surgery only	Dead	36
13 - 19 y	Male	White	>8cm	Regional	No	No	No treatment	Alive	38
20 - 39 y	Male	White	≤8cm	Distant	No	No	No treatment	Alive	5
13 - 19 y	Male	White	>8cm	Distant	No	No	No treatment	Dead	66
13 - 19 y	Male	White	>8cm	Localized	No	No	No treatment	Alive	78
≤12 y	Female	White	≤8cm	Distant	Yes	Yes	surgery+RT	Alive	83
13 - 19 y	Male	White	>8cm	Regional	No	No	No treatment	Dead	15
13 - 19 y	Male	White	>8cm	Distant	Yes	Yes	surgery+RT	Alive	56
20 - 39 y	Female	White	≤8cm	Distant	No	No	No treatment	Alive	71
20 - 39 y	Female	White	>8cm	Regional	No	No	No treatment	Alive	50
13 - 19 y	Male	White	>8cm	Distant	No	No	No treatment	Alive	20
13 - 19 y	Female	White	>8cm	Distant	No	No	No treatment	Alive	28
20 - 39 y	Male	White	>8cm	Distant	No	Yes	RT only	Dead	25
13 - 19 y	Male	White	>8cm	Regional	Yes	Yes	surgery+RT	Dead	79
≤12 y	Female	Black & Others	>8cm	Regional	Yes	No	surgery only	Alive	18
20 - 39 y	Male	White	>8cm	Regional	Yes	No	surgery only	Alive	43
13 - 19 y	Female	White	≤8cm	Distant	No	No	No treatment	Dead	2
20 - 39 y	Female	White	≤8cm	Distant	Yes	Yes	surgery+RT	Dead	98
13 - 19 y	Male	Black & Others	≤8cm	Distant	Yes	Yes	surgery+RT	Alive	129
13 - 19 y	Male	White	>8cm	Distant	No	No	No treatment	Dead	21
13 - 19 y	Male	White	>8cm	Regional	Yes	Yes	surgery+RT	Alive	127
13 - 19 y	Female	Black & Others	>8cm	Distant	Yes	Yes	surgery+RT	Dead	28
20 - 39 y	Female	White	≤8cm	Regional	Yes	Yes	surgery+RT	Alive	104
20 - 39 y	Male	White	>8cm	Distant	No	No	No treatment	Dead	14
13 - 19 y	Male	White	>8cm	Regional	Yes	Yes	surgery+RT	Alive	81
≤12 y	Male	White	>8cm	Regional	No	No	No treatment	Alive	79
20 - 39 y	Female	White	≤8cm	Regional	No	No	No treatment	Dead	37
≤12 y	Male	White	≤8cm	Distant	Yes	Yes	surgery+RT	Alive	75
13 - 19 y	Male	White	>8cm	Regional	Yes	Yes	surgery+RT	Alive	63
20 - 39 y	Male	White	>8cm	Localized	Yes	Yes	surgery+RT	Alive	60
20 - 39 y	Male	White	>8cm	Localized	No	No	No treatment	Alive	42
20 - 39 y	Male	White	≤8cm	Distant	Yes	Yes	surgery+RT	Dead	25
20 - 39 y	Male	Black & Others	>8cm	Regional	No	No	No treatment	Dead	15
20 - 39 y	Male	White	>8cm	Regional	Yes	Yes	surgery+RT	Dead	20
20 - 39 y	Male	Black & Others	>8cm	Distant	No	No	No treatment	Alive	27
13 - 19 y	Female	White	>8cm	Regional	No	No	No treatment	Alive	22
13 - 19 y	Female	White	>8cm	Distant	No	No	No treatment	Alive	11
20 - 39 y	Male	White	>8cm	Regional	No	No	No treatment	Alive	9
13 - 19 y	Female	White	>8cm	Regional	Yes	Yes	surgery+RT	Alive	103
20 - 39 y	Male	White	≤8cm	Distant	No	No	No treatment	Dead	18
20 - 39 y	Male	White	>8cm	Regional	Yes	Yes	surgery+RT	Dead	24
20 - 39 y	Male	White	>8cm	Regional	No	No	No treatment	Dead	18
13 - 19 y	Female	White	≤8cm	Regional	No	No	No treatment	Alive	72
13 - 19 y	Female	White	>8cm	Distant	No	No	No treatment	Dead	11
13 - 19 y	Male	White	>8cm	Localized	Yes	No	surgery only	Alive	70
13 - 19 y	Female	White	≤8cm	Regional	Yes	Yes	surgery+RT	Alive	94
20 - 39 y	Female	White	>8cm	Distant	No	No	No treatment	Dead	15
20 - 39 y	Male	White	≤8cm	Distant	No	No	No treatment	Dead	12
13 - 19 y	Female	White	>8cm	Distant	No	No	No treatment	Dead	7
20 - 39 y	Male	White	>8cm	Regional	No	No	No treatment	Dead	15
≤12 y	Female	White	≤8cm	Distant	Yes	No	surgery only	Alive	3
13 - 19 y	Male	White	≤8cm	Distant	No	No	No treatment	Dead	22
13 - 19 y	Male	White	>8cm	Regional	No	No	No treatment	Alive	130
13 - 19 y	Female	White	>8cm	Localized	Yes	Yes	surgery+RT	Alive	117
20 - 39 y	Male	White	>8cm	Localized	No	No	No treatment	Dead	36
20 - 39 y	Male	White	>8cm	Localized	No	No	No treatment	Alive	14
13 - 19 y	Female	Black & Others	>8cm	Distant	No	No	No treatment	Alive	21
20 - 39 y	Male	Black & Others	>8cm	Regional	No	No	No treatment	Alive	6
13 - 19 y	Male	White	>8cm	Distant	No	No	No treatment	Alive	0
20 - 39 y	Male	White	>8cm	Regional	No	No	No treatment	Dead	15
20 - 39 y	Male	White	>8cm	Regional	No	No	No treatment	Alive	114
13 - 19 y	Female	White	≤8cm	Regional	No	No	No treatment	Dead	43
20 - 39 y	Male	White	>8cm	Distant	No	No	No treatment	Dead	28
13 - 19 y	Male	White	>8cm	Distant	No	Yes	RT only	Dead	39
20 - 39 y	Female	White	≤8cm	Distant	No	No	No treatment	Alive	52
20 - 39 y	Male	White	>8cm	Distant	No	No	No treatment	Alive	24
20 - 39 y	Male	White	>8cm	Regional	Yes	Yes	surgery+RT	Dead	101
13 - 19 y	Male	White	≤8cm	Distant	No	No	No treatment	Dead	10
13 - 19 y	Female	White	>8cm	Regional	No	No	No treatment	Alive	133
13 - 19 y	Male	White	>8cm	Distant	No	Yes	RT only	Alive	109
20 - 39 y	Female	White	>8cm	Distant	No	No	No treatment	Dead	6
20 - 39 y	Male	White	>8cm	Regional	No	No	No treatment	Dead	54
20 - 39 y	Female	White	≤8cm	Distant	Yes	Yes	surgery+RT	Dead	15
13 - 19 y	Female	White	>8cm	Regional	Yes	No	surgery only	Alive	113
≤12 y	Male	White	>8cm	Regional	Yes	Yes	surgery+RT	Dead	20
≤12 y	Male	Black & Others	≤8cm	Regional	No	No	No treatment	Alive	86
13 - 19 y	Male	White	>8cm	Distant	No	No	No treatment	Dead	47
20 - 39 y	Male	White	>8cm	Distant	Yes	No	surgery only	Alive	78
20 - 39 y	Male	White	≤8cm	Distant	No	No	No treatment	Dead	6
13 - 19 y	Female	White	>8cm	Distant	Yes	No	surgery only	Dead	22
≤12 y	Male	White	>8cm	Regional	No	No	No treatment	Alive	75
13 - 19 y	Male	White	>8cm	Regional	No	No	No treatment	Dead	24
20 - 39 y	Male	White	>8cm	Distant	No	No	No treatment	Dead	14
20 - 39 y	Male	White	>8cm	Distant	No	No	No treatment	Alive	48
20 - 39 y	Female	White	>8cm	Distant	No	No	No treatment	Dead	12
13 - 19 y	Male	White	>8cm	Distant	No	No	No treatment	Dead	4
20 - 39 y	Male	White	>8cm	Distant	No	No	No treatment	Dead	19
≤12 y	Female	White	>8cm	Regional	Yes	No	surgery only	Alive	10
≤12 y	Male	Black & Others	>8cm	Regional	No	No	No treatment	Alive	5
20 - 39 y	Female	Black & Others	>8cm	Regional	No	No	No treatment	Alive	9
20 - 39 y	Male	White	>8cm	Distant	No	No	No treatment	Alive	1
≤12 y	Female	White	>8cm	Regional	No	No	No treatment	Alive	1
20 - 39 y	Male	White	>8cm	Regional	Yes	No	surgery only	Alive	106
≤12 y	Male	White	>8cm	Regional	No	No	No treatment	Alive	134
13 - 19 y	Male	White	≤8cm	Distant	No	Yes	RT only	Dead	53
≤12 y	Female	White	≤8cm	Regional	Yes	Yes	surgery+RT	Alive	136
13 - 19 y	Male	White	>8cm	Distant	No	No	No treatment	Dead	97
13 - 19 y	Male	White	≤8cm	Regional	No	No	No treatment	Dead	119
13 - 19 y	Male	White	>8cm	Localized	No	No	No treatment	Alive	122
20 - 39 y	Female	Black & Others	>8cm	Distant	No	Yes	RT only	Dead	15
13 - 19 y	Female	White	>8cm	Regional	Yes	Yes	surgery+RT	Alive	123
20 - 39 y	Male	White	>8cm	Distant	No	No	No treatment	Alive	10
20 - 39 y	Male	White	>8cm	Localized	Yes	Yes	surgery+RT	Dead	22
20 - 39 y	Female	White	>8cm	Distant	No	No	No treatment	Dead	6
≤12 y	Male	White	≤8cm	Distant	No	No	No treatment	Dead	20
≤12 y	Female	White	>8cm	Distant	No	No	No treatment	Dead	11
13 - 19 y	Male	White	>8cm	Localized	No	No	No treatment	Dead	44
20 - 39 y	Male	White	>8cm	Distant	No	No	No treatment	Dead	8
13 - 19 y	Male	White	>8cm	Regional	Yes	No	surgery only	Alive	73
≤12 y	Male	White	>8cm	Regional	No	No	No treatment	Alive	71
13 - 19 y	Male	White	≤8cm	Distant	No	No	No treatment	Dead	35
20 - 39 y	Female	White	≤8cm	Regional	No	No	No treatment	Alive	81
13 - 19 y	Female	White	>8cm	Distant	No	No	No treatment	Alive	68
13 - 19 y	Female	White	>8cm	Regional	Yes	No	surgery only	Dead	10
13 - 19 y	Male	White	>8cm	Distant	Yes	No	surgery only	Alive	80
13 - 19 y	Female	White	≤8cm	Regional	No	No	No treatment	Dead	34
20 - 39 y	Male	White	≤8cm	Localized	No	No	No treatment	Alive	80
13 - 19 y	Male	Black & Others	>8cm	Localized	No	No	No treatment	Dead	45
20 - 39 y	Male	White	>8cm	Regional	Yes	Yes	surgery+RT	Dead	9
20 - 39 y	Female	White	>8cm	Distant	No	No	No treatment	Dead	49
13 - 19 y	Male	White	≤8cm	Distant	Yes	Yes	surgery+RT	Alive	75
20 - 39 y	Male	White	≤8cm	Distant	No	No	No treatment	Dead	10
20 - 39 y	Female	White	>8cm	Distant	No	No	No treatment	Dead	9
20 - 39 y	Male	White	>8cm	Regional	No	No	No treatment	Dead	27
20 - 39 y	Male	White	≤8cm	Distant	No	No	No treatment	Alive	69
13 - 19 y	Male	White	>8cm	Localized	Yes	No	surgery only	Alive	60
20 - 39 y	Female	Black & Others	≤8cm	Regional	No	No	No treatment	Alive	61
13 - 19 y	Male	White	>8cm	Distant	Yes	No	surgery only	Alive	45
20 - 39 y	Male	White	>8cm	Distant	No	No	No treatment	Dead	8
13 - 19 y	Male	White	>8cm	Distant	Yes	Yes	surgery+RT	Dead	29
20 - 39 y	Male	White	>8cm	Distant	No	Yes	RT only	Dead	22
13 - 19 y	Male	Black & Others	≤8cm	Distant	No	No	No treatment	Dead	15
20 - 39 y	Male	White	>8cm	Distant	No	No	No treatment	Alive	52
13 - 19 y	Male	White	>8cm	Distant	Yes	No	surgery only	Alive	46
20 - 39 y	Male	White	>8cm	Regional	No	No	No treatment	Alive	45
20 - 39 y	Female	Black & Others	>8cm	Distant	No	No	No treatment	Dead	12
13 - 19 y	Male	White	>8cm	Distant	No	No	No treatment	Dead	19
20 - 39 y	Male	Black & Others	>8cm	Distant	No	No	No treatment	Dead	2
20 - 39 y	Male	White	≤8cm	Regional	No	No	No treatment	Alive	43
13 - 19 y	Female	White	>8cm	Distant	No	No	No treatment	Dead	37
13 - 19 y	Male	White	>8cm	Distant	No	No	No treatment	Alive	36
20 - 39 y	Female	White	>8cm	Distant	No	No	No treatment	Alive	33
20 - 39 y	Male	Black & Others	>8cm	Localized	No	No	No treatment	Alive	34
≤12 y	Female	White	≤8cm	Localized	No	No	No treatment	Alive	30
13 - 19 y	Male	White	>8cm	Distant	No	No	No treatment	Alive	28
13 - 19 y	Female	Black & Others	≤8cm	Distant	No	No	No treatment	Dead	11
13 - 19 y	Male	White	>8cm	Regional	No	No	No treatment	Alive	21
20 - 39 y	Male	White	≤8cm	Regional	No	No	No treatment	Alive	17
13 - 19 y	Male	White	>8cm	Distant	No	No	No treatment	Alive	15
13 - 19 y	Female	Black & Others	≤8cm	Localized	No	No	No treatment	Alive	12
13 - 19 y	Female	White	>8cm	Localized	No	No	No treatment	Alive	9
13 - 19 y	Male	White	>8cm	Regional	No	No	No treatment	Alive	7
20 - 39 y	Male	White	>8cm	Regional	No	No	No treatment	Alive	8
20 - 39 y	Female	White	>8cm	Regional	No	No	No treatment	Dead	4
20 - 39 y	Male	White	≤8cm	Distant	No	No	No treatment	Alive	7
13 - 19 y	Female	White	≤8cm	Localized	No	No	No treatment	Alive	3
20 - 39 y	Female	White	>8cm	Distant	Yes	Yes	surgery+RT	Alive	2
13 - 19 y	Male	White	≤8cm	Regional	Yes	No	surgery only	Alive	0
20 - 39 y	Male	White	>8cm	Distant	No	No	No treatment	Dead	12
13 - 19 y	Male	White	≤8cm	Localized	Yes	Yes	surgery+RT	Alive	120
13 - 19 y	Male	White	≤8cm	Localized	Yes	No	surgery only	Alive	106
13 - 19 y	Male	White	≤8cm	Distant	No	No	No treatment	Dead	14
20 - 39 y	Male	White	≤8cm	Distant	No	No	No treatment	Dead	11
13 - 19 y	Female	White	≤8cm	Distant	Yes	No	surgery only	Dead	27
13 - 19 y	Male	White	>8cm	Distant	No	No	No treatment	Dead	30
13 - 19 y	Female	Black & Others	≤8cm	Regional	No	No	No treatment	Dead	85
20 - 39 y	Female	Black & Others	≤8cm	Regional	No	No	No treatment	Alive	21
≤12 y	Male	White	>8cm	Distant	Yes	Yes	surgery+RT	Alive	24
20 - 39 y	Female	White	≤8cm	Localized	Yes	No	surgery only	Alive	5
≤12 y	Male	Black & Others	≤8cm	Distant	Yes	Yes	surgery+RT	Alive	0
20 - 39 y	Male	White	≤8cm	Distant	No	No	No treatment	Dead	22
20 - 39 y	Female	White	≤8cm	Distant	No	No	No treatment	Dead	57
13 - 19 y	Male	White	≤8cm	Localized	No	No	No treatment	Alive	117
13 - 19 y	Male	White	≤8cm	Distant	No	No	No treatment	Dead	12
20 - 39 y	Male	White	≤8cm	Regional	No	No	No treatment	Dead	8
13 - 19 y	Male	White	>8cm	Regional	No	No	No treatment	Alive	76
13 - 19 y	Female	White	>8cm	Distant	No	No	No treatment	Alive	56
20 - 39 y	Male	Black & Others	≤8cm	Regional	No	No	No treatment	Dead	28
≤12 y	Male	White	>8cm	Regional	Yes	Yes	surgery+RT	Alive	16
20 - 39 y	Male	White	≤8cm	Distant	No	No	No treatment	Alive	15
13 - 19 y	Male	White	≤8cm	Regional	Yes	No	surgery only	Alive	142
13 - 19 y	Female	Black & Others	≤8cm	Regional	No	No	No treatment	Dead	11
13 - 19 y	Female	White	>8cm	Regional	Yes	Yes	surgery+RT	Dead	22
13 - 19 y	Female	White	≤8cm	Localized	Yes	No	surgery only	Alive	126
13 - 19 y	Male	White	≤8cm	Regional	Yes	No	surgery only	Dead	55
13 - 19 y	Male	White	>8cm	Regional	Yes	Yes	surgery+RT	Dead	51
20 - 39 y	Female	White	≤8cm	Regional	Yes	Yes	surgery+RT	Alive	122
20 - 39 y	Female	White	>8cm	Distant	No	No	No treatment	Dead	26
20 - 39 y	Female	White	≤8cm	Regional	No	No	No treatment	Alive	100
13 - 19 y	Female	White	>8cm	Distant	No	No	No treatment	Dead	10
20 - 39 y	Male	White	≤8cm	Regional	Yes	No	surgery only	Alive	96
≤12 y	Male	White	≤8cm	Regional	Yes	Yes	surgery+RT	Alive	93
20 - 39 y	Male	White	≤8cm	Regional	No	No	No treatment	Dead	14
13 - 19 y	Male	White	>8cm	Regional	No	No	No treatment	Alive	84
20 - 39 y	Male	White	>8cm	Distant	No	No	No treatment	Alive	66
20 - 39 y	Female	White	≤8cm	Distant	No	No	No treatment	Dead	43
20 - 39 y	Male	White	>8cm	Regional	Yes	No	surgery only	Alive	72
≤12 y	Male	White	>8cm	Distant	No	No	No treatment	Dead	28
13 - 19 y	Male	White	≤8cm	Distant	No	No	No treatment	Dead	22
13 - 19 y	Female	White	>8cm	Distant	No	No	No treatment	Alive	62
13 - 19 y	Female	White	>8cm	Localized	No	No	No treatment	Alive	58
20 - 39 y	Male	White	>8cm	Localized	Yes	Yes	surgery+RT	Dead	14
13 - 19 y	Female	White	≤8cm	Regional	Yes	Yes	surgery+RT	Alive	49
≤12 y	Female	White	>8cm	Localized	Yes	No	surgery only	Alive	41
≤12 y	Female	White	>8cm	Localized	No	No	No treatment	Alive	18
20 - 39 y	Male	White	≤8cm	Distant	No	No	No treatment	Alive	20
13 - 19 y	Male	White	≤8cm	Regional	Yes	No	surgery only	Alive	13
20 - 39 y	Male	White	>8cm	Localized	Yes	No	surgery only	Alive	11
20 - 39 y	Male	White	>8cm	Distant	No	No	No treatment	Alive	13
13 - 19 y	Male	Black & Others	≤8cm	Regional	No	No	No treatment	Alive	6
13 - 19 y	Male	White	>8cm	Localized	Yes	No	surgery only	Alive	7
13 - 19 y	Female	White	>8cm	Regional	No	No	No treatment	Alive	3
20 - 39 y	Male	White	>8cm	Localized	No	No	No treatment	Alive	62
20 - 39 y	Male	Black & Others	≤8cm	Regional	No	No	No treatment	Dead	16
20 - 39 y	Male	White	≤8cm	Regional	No	No	No treatment	Alive	105
20 - 39 y	Male	White	≤8cm	Distant	No	No	No treatment	Dead	41
20 - 39 y	Male	Black & Others	>8cm	Distant	No	No	No treatment	Dead	0
13 - 19 y	Female	White	≤8cm	Localized	No	No	No treatment	Alive	45
20 - 39 y	Male	White	>8cm	Distant	No	No	No treatment	Dead	45
13 - 19 y	Male	White	>8cm	Regional	No	No	No treatment	Dead	22
≤12 y	Female	White	>8cm	Localized	Yes	No	surgery only	Alive	75
13 - 19 y	Female	White	≤8cm	Distant	No	No	No treatment	Alive	37
≤12 y	Male	Black & Others	≤8cm	Distant	No	Yes	RT only	Alive	45
13 - 19 y	Female	White	≤8cm	Distant	No	No	No treatment	Alive	46
≤12 y	Male	White	≤8cm	Regional	No	No	No treatment	Alive	32
13 - 19 y	Male	White	≤8cm	Distant	No	No	No treatment	Dead	9
13 - 19 y	Female	White	>8cm	Distant	No	Yes	RT only	Dead	10
13 - 19 y	Male	White	>8cm	Regional	Yes	Yes	surgery+RT	Alive	20
20 - 39 y	Female	White	>8cm	Distant	No	No	No treatment	Alive	13
20 - 39 y	Male	Black & Others	>8cm	Distant	No	No	No treatment	Dead	3
